# Supplementary material
Source: ML conference proceedings conference paper supplement (https://proceedings.mlr.press/v139/kim21c.html)
Supplement: Supplementary file 1 [file kim21c-supp.pdf]

# Reward Identification in Inverse Reinforcement Learning

## A. Proofs

First we state some lemmas that will be used in proving the main theorems.

### A.1. Proper MDP Models

**Example 1.** Let  $J_{\text{MaxEnt}}$  be the MaxEntRL objective. Then, the MaxEnt MDP model  $\mathcal{P}_{\text{MDP}}[R; d, T, J_{\text{MaxEnt}}]$  is proper.

*Proof.* Let  $R$  be any set of reward functions. We need to show that  $\forall r, \hat{r} \in R, r \cong_{\tau} \hat{r} \Rightarrow p_r = p_{\hat{r}}$ . If  $r \cong_{\tau} \hat{r}$ , then  $r$  and  $\hat{r}$  have trajectory level rewards shifted by a constant, i.e for all  $x_0 \in \mathcal{X}^0$  there exists a constant  $c_{x_0}$  such that  $\forall \tau \in \Omega[x_0, d, T], \hat{r}(\tau) = r(\tau) + c_{x_0}$ . It suffices to show that the optimal policies for  $r, \hat{r}$  are the same. For any policy family  $\Pi$ ,

$$\begin{aligned} \arg \max_{\pi \in \Pi} \mathbb{E}_{\tau \sim \pi}[\hat{r}(\tau)] + \mathcal{H}(\pi) &= \arg \max_{\pi \in \Pi} \left( \sum_{x_0 \in \mathcal{X}^0} \sum_{\tau \in \Omega[x_0, d, T]} p(\tau; \pi) \hat{r}(\tau) \right) + \mathcal{H}(\pi) \\ &= \arg \max_{\pi \in \Pi} \left( \sum_{x_0 \in \mathcal{X}^0} \sum_{\tau \in \Omega[x_0, d, T]} p(\tau; \pi) (r(\tau) + c_{x_0}) \right) + \mathcal{H}(\pi) \\ &= \arg \max_{\pi \in \Pi} \left( \sum_{x_0 \in \mathcal{X}^0} \sum_{\tau \in \Omega[x_0, d, T]} p(\tau; \pi) r(\tau) \right) + \left( \sum_{x_0 \in \mathcal{X}^0} P_0(x_0) c_{x_0} \right) + \mathcal{H}(\pi) \\ &= \arg \max_{\pi \in \Pi} \mathbb{E}_{\tau \sim \pi} [r(\tau)] + \mathbb{E}_{x_0 \sim P_0} [c_{x_0}] + \mathcal{H}(\pi) \\ &= \arg \max_{\pi \in \Pi} \mathbb{E}_{\tau \sim \pi} [r(\tau)] + \mathcal{H}(\pi) \end{aligned}$$

where  $\mathcal{H}(\pi) := \mathbb{E}_{\pi}[-\sum_{t=0}^T \gamma^t \log \pi(a_t | s_t)]$  is the  $\gamma$ -discounted causal entropy. The last step holds since  $\mathbb{E}_{x_0 \sim P_0} [c_{x_0}]$  is constant with respect to  $\pi$ .  $\square$

### A.2. Weak Identifiability

**Lemma 1.** For all reward families  $R, r, \hat{r} \in R$ , and any  $(d, T)$ ,  $(r \cong_{x,a} \hat{r}) \Rightarrow (r \cong_{\tau} \hat{r})$

*Proof.* Let  $r, \hat{r} \in R$  be rewards such that  $r \cong_{x,a} \hat{r}$ . For all  $\tau, \tau' \in \Omega[d, T]$ , where  $\tau = (x_t, a_t)_{0 \leq t \leq T}$ ,  $\tau' = (x'_t, a'_t)_{0 \leq t \leq T}$ ,

$$\hat{r}(\tau) - r(\tau) = \sum_{t=0}^T \gamma^t (\hat{r}(x_t, a_t) - r(x_t, a_t)) \quad (6)$$

$$\begin{aligned} &= \sum_{t=0}^T \gamma^t (\hat{r}(x'_t, a'_t) - r(x'_t, a'_t)) \quad (7) \\ &= \hat{r}(\tau') - r(\tau') \end{aligned}$$

where 6  $\rightarrow$  7 holds since for all  $0 \leq t \leq T$ ,  $(x_t, a_t), (x'_t, a'_t) \in \mathcal{X} \times \mathcal{A}$  and so  $\hat{r}(x_t, a_t) - r(x_t, a_t) = \hat{r}(x'_t, a'_t) - r(x'_t, a'_t)$ . Thus,  $r \cong_{\tau} \hat{r}$   $\square$

**Proposition 1.** A proper MDP model is strongly identifiable only if it is weakly identifiable

*Proof.* We prove the contrapositive: if a proper MDP model is not weakly identifiable it is also not strongly identifiable. Let  $\mathcal{P}_{\text{MDP}}[R; d, T, J]$  be a proper MDP model that is not weakly identifiable. Since the model is not weakly identifiable, there exists  $r, \hat{r} \in R$  such that either  $(r \cong_{\tau} \hat{r}$  and  $p_r \neq p_{\hat{r}})$  or  $(r \not\cong_{\tau} \hat{r}$ , and  $p_r = p_{\hat{r}})$ . Since the model is proper the former cannot be true. Thus it must be that there exists  $r, \hat{r} \in R$  such that  $r \not\cong_{\tau} \hat{r}$ , and  $p_r = p_{\hat{r}}$ . Then, by the contrapositive of Lemma 1,  $r \not\cong_{x,a} \hat{r}$ . Thus,  $p_r = p_{\hat{r}} \not\Rightarrow r \cong_{x,a} \hat{r}$  and  $\mathcal{P}_{\text{MDP}}[R; d, T, J]$  is not strongly identifiable as desired.  $\square$

**Theorem 1.** Let  $\mathcal{P}_{\text{MDP}}[R; d, T, J_{\text{MaxEnt}}]$  be a MaxEnt MDP model and  $R \subseteq \{r \mid r : \mathcal{X} \times \mathcal{A} \rightarrow \mathbb{R}\}$  be any set of rewards. Then, for all domains  $d := (\mathcal{X}, \mathcal{A}, P, P_0, \gamma)$  consisting of deterministic transition dynamics, i.e.  $\forall(x, a), |\text{supp}(P(\cdot|x, a))|=1$ , a deterministic initial state, i.e.  $|\text{supp}(P_0)|=1$ , and  $T \geq 0$ ,  $\mathcal{P}_{\text{MDP}}[R; d, T, J_{\text{MaxEnt}}]$  is weakly identifiable.

*Proof.* We seek to show that  $\forall r, \hat{r} \in R, (r \cong_{\tau} \hat{r}) \iff (p_r = p_{\hat{r}})$ . Since  $\mathcal{P}_{\text{MDP}}$  is a MaxEnt MDP model, it is proper by Example 1 and as a result  $(r \cong_{\tau} \hat{r}) \Rightarrow (p_r = p_{\hat{r}})$ . We are left to prove that  $\forall r, \hat{r} \in R, (p_r = p_{\hat{r}}) \Rightarrow (r \cong_{\tau} \hat{r})$

From Ziebart et al. (2008), for all MDPs with deterministic dynamics and a deterministic initial state, the trajectory distribution of the MaxEnt optimal policy is

$$p_r(\tau) = \frac{e^{r(\tau)}}{Z_r}$$

where  $Z_r = \int_{\Omega[d, T]} e^{r(\tau')} d\tau'$  is the partition function. Then,  $\forall \tau \in \Omega[d, T]$

$$\begin{aligned} p_r(\tau) &= p_{\hat{r}}(\tau) \\ \log p_r(\tau) &= \log p_{\hat{r}}(\tau) \\ r(\tau) - \log Z_r &= \hat{r}(\tau) - \log Z_{\hat{r}} \\ r(\tau) &= \hat{r}(\tau) + \log \frac{Z_r}{Z_{\hat{r}}} \end{aligned}$$

Since,  $\log \frac{Z_r}{Z_{\hat{r}}}$  is a constant w.r.t  $\tau$ , we have  $r \cong_{\tau} \hat{r}$  as desired.  $\square$

**Proposition 2.** Let  $\mathcal{P}_{\text{MDP}}[R; d, T, J]$  be an MDP model that is weakly identifiable. Then, it is strongly identifiable if and only if for all  $r, \hat{r} \in R, (r \cong_{\tau} \hat{r}) \Rightarrow (r \cong_{x,a} \hat{r})$ . In other words,  $\forall r \in R, [r]_{\tau} \subseteq [r]_{x,a}$ .

*Proof.* Let  $\mathcal{P}_{\text{MDP}}[R; d, T, J]$  be weakly identifiable. We abbreviate Strongly Identifiable as S.I.

• (Sufficiency)  $\forall r \in R, [r]_{\tau} \subseteq [r]_{x,a} \Rightarrow \mathcal{P}_{\text{MDP}}$  is S.I.

By weak identifiability, for all  $r, \hat{r} \in R, (p_r = p_{\hat{r}}) \Rightarrow (r \cong_{\tau} \hat{r})$  and by  $(r \cong_{\tau} \hat{r}) \Rightarrow (r \cong_{x,a} \hat{r})$ , we have  $r \cong_{x,a} \hat{r}$ . Thus,  $(p_r = p_{\hat{r}}) \Rightarrow (r \cong_{x,a} \hat{r})$ .

By Lemma 1, for all  $r, \hat{r} \in R, (r \cong_{x,a} \hat{r}) \Rightarrow (r \cong_{\tau} \hat{r})$ , and by weak identifiability  $(r \cong_{\tau} \hat{r}) \Rightarrow (p_r = p_{\hat{r}})$ . Thus,  $(r \cong_{x,a} \hat{r}) \Rightarrow (p_r = p_{\hat{r}})$ .

We have  $\forall r, \hat{r} \in R, (r \cong_{x,a} \hat{r}) \iff (p_r = p_{\hat{r}})$  as desired.

• (Necessity)  $\mathcal{P}_{\text{MDP}}$  is S.I.  $\Rightarrow \forall r \in R, [r]_{\tau} \subseteq [r]_{x,a}$ .

We prove the contrapositive. Suppose there exists  $r, \hat{r} \in R$  such that  $r \cong_{\tau} \hat{r}$  but  $r \not\cong_{x,a} \hat{r}$ . By weak identifiability,  $(r \cong_{\tau} \hat{r}) \Rightarrow (p_r = p_{\hat{r}})$ , so  $(p_r = p_{\hat{r}}) \not\Rightarrow (r \cong_{x,a} \hat{r})$ . Thus,  $\mathcal{P}_{\text{MDP}}[R; d, J, T]$  is not strongly identifiable.  $\square$

**Corollary 1.** Let  $\mathcal{P}_{\text{MDP}}[R; d, T, J]$  be an MDP model that is weakly identifiable,  $R$  be the set of all rewards,  $|\mathcal{X}^0|=1$ , and  $\gamma = 1$ . Then, it is strongly identifiable if and only if  $\text{rank}(A[d, T]) = |\mathcal{X} \times \mathcal{A}|$

*Proof.* Let  $\mathcal{P}_{\text{MDP}}$  be weakly identifiable,  $\gamma = 1$ .

• (Sufficiency) We seek to show that if  $\text{rank}(A[d, T]) = |\mathcal{X} \times \mathcal{A}|$ , then  $\mathcal{P}_{\text{MDP}}$  is strongly identifiable. By Proposition 2, it suffices to show that  $\forall r, \hat{r} \in R, (r \cong_{\tau} \hat{r}) \Rightarrow (r \cong_{x,a} \hat{r})$ , i.e trajectory equivalence implies state-action equivalence.

Since  $A[d, T]$  is full rank, the solution to the linear system  $A[d, T]\mathbf{r}_{x,a} = \mathbf{r}_{\tau}$  is unique for any  $\mathbf{r}_{\tau}$ . Let  $\mathbf{r}_{\tau}, \hat{\mathbf{r}}_{\tau}$  be two trajectory equivalent rewards such that  $\mathbf{r}_{\tau} = \hat{\mathbf{r}}_{\tau} + \mathbf{c}$  for some constant vector  $\mathbf{c} = (c, \dots, c) \in \mathbb{R}^{|\Omega[d, T]|}$ . Then,

$$\begin{aligned} A[d, T]\mathbf{r}_{x,a} - A[d, T]\hat{\mathbf{r}}_{x,a} &= \mathbf{r}_{\tau} - \hat{\mathbf{r}}_{\tau} \\ A[d, T](\mathbf{r}_{x,a} - \hat{\mathbf{r}}_{x,a}) &= \mathbf{c} \end{aligned}$$

Since  $A[d, T]$  is a trajectory matrix,  $\forall i, \sum_j A_{ij}[d, T] = T + 1$ , i.e all feasible trajectories are of the same length and hence visit the same number of (not necessarily distinct) nodes. Thus, one solution to  $A[d, T](\mathbf{r}_{x,a} - \hat{\mathbf{r}}_{x,a}) = \mathbf{c}$  is to let

$\mathbf{r}_{x,a} - \hat{\mathbf{r}}_{x,a} = (\frac{c}{T+1}, \dots, \frac{c}{T+1})$ . In fact, since  $A[d, T]$  is full rank,  $(\frac{c}{T+1}, \dots, \frac{c}{T+1})$  is the only solution and thus  $\mathbf{r}_{x,a}, \hat{\mathbf{r}}_{x,a}$  are trajectory equivalent,  $\forall x, a \in \mathcal{X} \times \mathcal{A}, r(x, a) = \hat{r}(x, a) + \frac{c}{T+1}$  implying  $r \cong_{x,a} \hat{r}$ .

• (Necessity) We show that if  $\mathcal{P}_{\text{MDP}}$  be strongly identifiable, then  $\text{rank}(A[d, T]) = |\mathcal{X} \times \mathcal{A}|$ . By strong identifiability,  $\forall r, \hat{r} \in R, (r \cong_{\tau} \hat{r}) \Rightarrow (r \cong_{x,a} \hat{r})$  and thus general solutions to

$$A[d, T]\mathbf{r}_{x,a} = \mathbf{r}_{\tau}$$

must only be constant shifts of a particular solution. Equivalently,  $\ker(A[d, T])$  must only contain constant vectors. We then claim that in fact  $\ker(A[d, T])$  only contains the zero vector and thus  $A[d, T]$  is full rank.

Suppose for contradiction that  $\mathbf{c} \in \ker(A[d, T])$  for some non-zero constant vector  $\mathbf{c}$ . Then, for any scalar  $k \in \mathbb{R}$ ,  $k\mathbf{c} \in \ker(A[d, T])$ . Thus the kernel must contain all constant vectors. Pick a strictly positive constant vector  $\mathbf{c}^+ = (c^+, \dots, c^+)$  where  $c^+ > 0$ . Then,  $\mathbf{c}^+ \in \ker(A[d, T]) \Rightarrow A[d, T]\mathbf{c}^+ = 0$ , so  $\forall i, \sum_j A_{ij}[d, T]c^+ = c^+ \sum_j A_{ij}[d, T] = 0 \Rightarrow \forall i, \sum_j A_{ij}[d, T] = 0$ . Since  $A[d, T]$  is a trajectory (path) matrix, its entries represent visitation counts of a state-action pair and thus are all non-negative, i.e  $\forall i, j, A_{ij}[d, T] \geq 0$ . Therefore,  $(\forall i, \sum_j A_{ij}[d, T] = 0) \Rightarrow (\forall i, j, A_{ij}[d, T] = 0)$ , so  $A[d, T]$  is the zero-matrix. Then,  $\ker(A[d, T]) = \mathbb{R}^{|\mathcal{X} \times \mathcal{A}|}$  which contradicts strong identifiability. Therefore,  $\ker(A[d, T])$  can only contain the zero vector and  $A[d, T]$  is full rank, i.e  $\text{rank}(A[d, T]) = |\mathcal{X} \times \mathcal{A}|$ .  $\square$

### A.3. Properties of Domain Graphs

**Lemma 2.** Let  $G_d = (V_d, E_d, V_d^0)$  be a domain graph.

1. (Commutative) For all  $V \subseteq V_d$  and  $t, t' \geq 0$ ,  $L_{t'}(L_t(V)) = L_{t+t'}(V)$
2. (Monotonic) For all  $V, V' \subseteq V_d$  such that  $V \subseteq V'$  and  $t \geq 0$ ,  $L_t(V) \subseteq L_t(V')$

*Proof.* • (Commutative) We first prove that  $L_{t'}(L_t(V)) \subseteq L_{t+t'}(V)$ . Let  $v \in L_{t'}(L_t(V))$ , then by Definition 6,  $\exists \zeta' = (v'_i)_{0 \leq i \leq t'}$  such that  $v'_t = v$  and  $v'_0 \in L_t(V)$ , i.e  $\exists \zeta = (v_i)_{0 \leq i \leq t}$  where  $v_t = v'_0, v_0 \in V$ . Then,  $v \in L_{t+t'}(V)$  since there exists a path  $\zeta \oplus \zeta'_1 = (v_0, \dots, v_t, v'_1, \dots, v'_t)$  such that  $v'_t = v$  and  $v_0 \in V$ .

Next, we prove that  $L_{t+t'}(V) \subseteq L_{t'}(L_t(V))$ . If  $v \in L_{t+t'}(V)$ , then  $\exists \zeta'' = (v''_i)_{0 \leq i \leq t+t'}$  such that  $v''_{t+t'} = v$  and  $v''_0 \in V$ . Then, there exists paths  $\zeta = (v_i)_{0 \leq i \leq t} = (v''_0, \dots, v''_t)$  and  $\zeta' = (v'_i)_{0 \leq i \leq t'} = (v''_t, \dots, v''_{t+t'})$  which can be joined to form  $\zeta''$ . Therefore,  $v \in L_{t'}(L_t(V))$  since there exists a path  $\zeta'$  such that  $v'_t = v$  and  $v'_0 \in L_t(V)$  since  $\zeta$  is a path such that  $v_t = v'_0$  and  $v_0 \in V$ .

• (Monotonic) Let  $V, V' \subseteq V_d$  satisfy  $V \subseteq V'$ . If  $v \in L_t(V)$ , then by Definition 6,  $\exists \zeta = (v_i)_{0 \leq i \leq t}$  such that  $v_t = v$  and  $v_0 \in V$ . Since  $V \subseteq V', v_0 \in V'$  as well. Therefore,  $v \in L_t(V')$ .  $\square$

**Lemma 3.** If  $G_d$  is coverable, then  $\cup_{(x,a) \in \mathcal{X} \times \mathcal{A}} \text{supp}(P(\cdot|x, a)) = \mathcal{X}$

*Proof.* Since  $G_d$  is coverable, there exists  $v \in V_d^0$  and  $t \geq 0$  such that  $L_t(v) = V_d$ . If  $G_d$  is 0-coverable, i.e  $L_0(v) = \{v\} = V_d = \mathcal{X} \times \mathcal{A}$ , then  $|\mathcal{X} \times \mathcal{A}| = 1$  and thus  $\text{supp}(P(\cdot|x, a)) = \{x\} = \mathcal{X}$ . For  $t \geq 1$ , since  $L_t(v) = L_1(L_{t-1}(v)) = V_d$  and  $L_{t-1}(v) \subseteq V_d$ , by Lemma 2 monotonicity, we have  $L_1(L_{t-1}(v)) = V_d \subseteq L_1(V_d)$ . Since  $L_1(V_d) \subseteq V_d$ , it must be that  $L_1(V_d) = V_d = \mathcal{X} \times \mathcal{A}$ . By definition of layers,  $L_1(V_d) = (\cup_{(x,a) \in \mathcal{X} \times \mathcal{A}} \text{supp}(P(\cdot|x, a))) \times \mathcal{A}$  and thus  $\cup_{(x,a) \in \mathcal{X} \times \mathcal{A}} \text{supp}(P(\cdot|x, a)) = \mathcal{X}$ .  $\square$

**Lemma 4.** Let  $G_d$  be a domain graph and  $v \in V_d$  be  $t$ -covering. Then for all  $t' \geq t$ ,  $L_{t'}(v) = V_d$ .

*Proof.* We prove by induction.

- Base  $t' = t$ : trivially holds since  $L_t(v) = V_d$  by definition of a covering vertex.
- For  $t' \geq t$ :  $L_{t'}(v) = V_d \Rightarrow L_{t'+1}(v) = V_d$ .

$$L_{t'+1}(v) = L_1(L_{t'}(v)) = L_1(V_d)$$

$L_t(v) = L_1(L_{t-1}(v)) = V_d$  and  $L_{t-1}(v) \subseteq V_d$ , we have that  $L_1(L_{t-1}(v)) = V_d \subseteq L_1(V_d)$  by Lemma 2 monotonicity. Since  $L_1(V_d) \subseteq V_d$ , it must be that  $L_1(V_d) = V_d$ .  $\square$

**Proposition 3.** *Let  $G_d$  be strongly connected. Then,  $G_d$  is aperiodic if and only if it is coverable.*

*Proof.* (aperiodic  $\Rightarrow$  coverable) If  $G_d$  is aperiodic, there exists two cycles  $C = (v_i)_{0 \leq i \leq k}$ ,  $C' = (v'_i)_{0 \leq i \leq k'}$  of coprime length  $k, k'$ . For any  $v \in V_d^0$  and any destination vertex  $\tilde{v} \in V_d$  consider paths that start from  $v$ , reaches  $v_0$  via a shortest path  $\zeta^{v \rightarrow v_0}$ , loops  $n$  times around cycle  $C$  back to  $v_0$ , reaches  $v'_0$  via a shortest path  $\zeta^{v_0 \rightarrow v'_0}$ , loops  $n'$  times around cycle  $C'$  back to  $v'_0$ , and finally reaches  $\tilde{v}$  via a shortest path  $\zeta^{v'_0 \rightarrow \tilde{v}}$ , i.e

$$\zeta^{v \rightarrow \tilde{v}} = \zeta^{v \rightarrow v_0} \oplus n \cdot C_1 \oplus \zeta^{v_0 \rightarrow v'_0} \oplus n' \cdot C'_1 \oplus \zeta^{v'_0 \rightarrow \tilde{v}}$$

The paths  $\zeta^{v \rightarrow v_0}$ ,  $\zeta^{v_0 \rightarrow v'_0}$ ,  $\zeta^{v'_0 \rightarrow \tilde{v}}$  exist by strong connectivity of  $G_d$ . We let  $|\zeta|$  denote the length of a path. Then,

$$|\zeta^{v \rightarrow \tilde{v}}| = nk + n'k' + |\zeta^{v \rightarrow v_0}| + |\zeta^{v_0 \rightarrow v'_0}| + |\zeta^{v'_0 \rightarrow \tilde{v}}| \quad (8)$$

Since  $k, k'$  are coprime, for all  $|\zeta^{v \rightarrow \tilde{v}}| \geq (k-1)(k'-1) + |\zeta^{v \rightarrow v_0}| + |\zeta^{v_0 \rightarrow v'_0}| + |\zeta^{v'_0 \rightarrow \tilde{v}}|$ , there exists  $n, n'$  such that Eq. 8 holds. (Corollary 2 of Denardo (1977)) Furthermore, since  $|\zeta^{v \rightarrow v_0}|, |\zeta^{v_0 \rightarrow v'_0}|, |\zeta^{v'_0 \rightarrow \tilde{v}}| \leq |V_d|$  since they are shortest paths. Thus, for any destination vertex  $\tilde{v} \in V_d$  and all lengths  $T \geq (k-1)(k'-1) + 3|V_d|$ , there exists a path  $\zeta^{v \rightarrow \tilde{v}}$  such that  $|\zeta^{v \rightarrow \tilde{v}}| = T$ . Therefore,  $G_d$  is coverable.

(coverable  $\Rightarrow$  aperiodic) If  $G_d$  is coverable, there exists  $v \in V_d^0$  and  $t \geq 0$  such that  $L_t(v) = V_d$ . If  $t = 0$ , then  $V_d = \{v\}$  and there must be an edge  $(v, v) \in E_d$ . Therefore, there exists cycles  $(v, v)$ ,  $(v, v, v)$  which have coprime lengths 1 and 2, respectively. For  $t \geq 1$ , by Lemma 4,  $L_{t+1}(v) = V_d$ . Since  $v \in L_t(v)$  and  $v \in L_{t+1}(v)$ , there exists cycles of coprime length  $t, t+1$  that start and end at  $v$ . Thus,  $G_d$  is aperiodic.  $\square$

#### A.4. Strong Identifiability

**Theorem 2.** (Strong Identification Condition) *For all  $(d, r, T, J)$  such that the MDP model  $\mathcal{P}_{\text{MDP}}[R; d, T, J]$  is proper and  $G_d$  is strongly connected,*

- (Sufficiency)  $\mathcal{P}_{\text{MDP}}[R; d, T, J]$  is weakly identifiable,  $G_d$  is  $T_0$ -coverable, and  $T \geq 2T_0 \Rightarrow \mathcal{P}_{\text{MDP}}[R; d, T, J]$  is strongly identifiable
- (Necessity)  $\mathcal{P}_{\text{MDP}}[R; d, T, J]$  is strongly identifiable  $\Rightarrow \mathcal{P}_{\text{MDP}}[R; d, T, J]$  is weakly identifiable,  $G_d$  is coverable.

*Proof.* Let  $\mathcal{P}_{\text{MDP}}[R; d, T, J]$  be proper and  $G_d$  be strongly connected.

- (Sufficiency) Let  $\mathcal{P}_{\text{MDP}}[R; d, T, J]$  be proper and weakly identifiable,  $G_d$  be strongly connected and  $T_0$ -covering, and  $T \geq 2T_0$ . By Proposition 2 it suffices to show that

$$\begin{aligned} \forall x \in \mathcal{X}^0, \forall \tau, \tau' \in \Omega[x, d, T], \hat{r}(\tau) - r(\tau) = \hat{r}(\tau') - r(\tau') \Rightarrow \\ \forall (x, a), (x', a') \in \mathcal{X} \times \mathcal{A}, \hat{r}(x, a) - r(x, a) = \hat{r}(x', a') - r(x', a') \end{aligned}$$

In the language of domain graphs, this statement translates to:

$$\forall v \in V_d^0, \forall \zeta, \zeta' \in Z[v, d, T], \hat{r}(\zeta) - r(\zeta) = \hat{r}(\zeta') - r(\zeta') \Rightarrow \forall v, v' \in V_d, \hat{r}(v) - r(v) = \hat{r}(v') - r(v')$$

Let  $r, \hat{r}$  be any two rewards such that,  $\forall v \in V_d^0, \forall \zeta, \zeta' \in Z[v, d, T], \hat{r}(\zeta) - r(\zeta) = \hat{r}(\zeta') - r(\zeta')$  or equivalently  $\hat{r}(\zeta) - \hat{r}(\zeta') = r(\zeta) - r(\zeta')$ . Let  $v_0^* \in V_d^0$  be any vertex that is  $T_0$ -covering and for any integer  $t \geq 0$  let  $H_t$  be the statement that,

$$\forall v, v' \in L_t(v_0^*), \hat{r}(v') - \hat{r}(v) = r(v') - r(v)$$

Since  $v_0^*$  is  $T_0$ -covering, we have that  $L_{T_0}(v_0^*) = V_d$ , so it suffices to prove  $H_{T_0}$ . We prove by strong induction.

$H_0$ : Trivially true, since  $L_0(v_0^*) = \{v_0^*\}$  only has one element.

$H_{<t} \Rightarrow H_t$  for all  $0 < t \leq T_0$ : Let  $\zeta^0 \in Z[v_0^*, d, T-t]$  be any base path of length  $T-t$  that starts at  $v_0^*$  and reaches  $v_0^*$  again  $T-t$  steps. Such a base path exists for all  $0 \leq t \leq T_0$  since  $T \geq 2T_0 \Rightarrow T-t \geq T_0$  and so by Lemma 4,  $v_0^* \in L_{T_0}(v_0^*) \Rightarrow v_0^* \in L_{T-t}(v_0^*)$ .

We will use  $Z_t$  to denote the set of all paths of length  $T$  that starts at  $v_0^*$  and follows  $\zeta^0$  to reach  $v_0^*$  again at time  $T-t$ , then reaches a vertex in  $L_t(v_0^*)$  in  $t$  steps, i.e.

$$Z_t = \{\zeta \in Z[v_0^*, d, T] \mid \zeta_{:-t} = \zeta^0\}$$

It's then clear that the set terminal vertices of paths in  $Z_t$  is equal to  $L_t(v_0^*)$ , i.e.  $\{v \mid \exists \zeta := (v_t)_{0 \leq t \leq T} \in Z_t \text{ s.t. } v = v_T\} = L_t(v_0^*)$  since  $Z_t$  contains all possible paths that take  $t$  steps after reaching  $v_0^*$

Consider any two  $\zeta, \zeta' \in Z_t$  where  $\zeta = (v_t)_{0 \leq t \leq T}$ ,  $\zeta' = (v'_t)_{0 \leq t \leq T}$ .

$$\hat{r}(\zeta) - \hat{r}(\zeta') = \hat{r}(\zeta_{:-t+1}) - \hat{r}(\zeta'_{:-t+1}) + \hat{r}(\zeta_{-t+1:}) - \hat{r}(\zeta'_{-t+1:}) + \gamma^T(\hat{r}(v_T) - \hat{r}(v'_T)) \quad (9)$$

$$r(\zeta) - r(\zeta') = r(\zeta_{:-t+1}) - r(\zeta'_{:-t+1}) + r(\zeta_{-t+1:}) - r(\zeta'_{-t+1:}) + \gamma^T(r(v_T) - r(v'_T)) \quad (10)$$

Since  $\zeta_{:-t+1} = \zeta'_{:-t+1} = \zeta^0$ , we have  $\hat{r}(\zeta_{:-t+1}) - \hat{r}(\zeta'_{:-t+1}) = r(\zeta_{:-t+1}) - r(\zeta'_{:-t+1}) = 0$ . Furthermore,

$$\begin{aligned} \hat{r}(\zeta_{-t+1:}) - \hat{r}(\zeta'_{-t+1:}) &= \sum_{t'=0}^{t-1} \gamma^{T-t'} (\hat{r}(v_{T-t'}) - \hat{r}(v'_{T-t'})) \\ &= \sum_{t'=0}^{t-1} \gamma^{T-t'} (r(v_{T-t'}) - r(v'_{T-t'})) \\ &= r(\zeta_{-t+1:}) - r(\zeta'_{-t+1:}) \end{aligned} \quad (11)$$

since for all  $0 \leq t' < t$ ,  $v_{T-t'}, v'_{T-t'} \in L_{t-t'}(v_0^*)$  and by the inductive hypothesis  $H_{<t}$ , it holds that, for all  $0 \leq t' < t$ ,  $\hat{r}(v_{T-t'}) - \hat{r}(v'_{T-t'}) = r(v_{T-t'}) - r(v'_{T-t'})$ .

By definition,  $Z_t \subseteq Z[v_0^*, d, T]$ , and thus by weak identifiability,  $\hat{r}(\zeta) - \hat{r}(\zeta') = r(\zeta) - r(\zeta')$ . Combining with Eq. 9, 10, 11, we get that for all  $v_T, v'_T \in \{v \mid \exists \zeta := (v_t)_{0 \leq t \leq T} \in Z_t \text{ s.t. } v = v_T\} = L_t(v_0^*)$ ,

$$\hat{r}(v_T) - \hat{r}(v'_T) = r(v_T) - r(v'_T)$$

Thus, by strong induction  $H_t$  is true for  $0 \leq t \leq T_0$ , which includes  $H_{T_0}$ .

- (Necessity) Next we prove necessity. To do so, we will first prove some useful properties of layer sequences.

**Lemma 5.** *Let  $G_d$  be strongly connected. Then, for all  $v, v' \in V_d$ , there exists  $t \geq 1$  such that  $v' \in L_t(v)$ .*

*Proof.* Pick any  $v, v' \in V_d$ . Since  $G_d$  is strongly connected, there exists a path  $\zeta$  of length  $|\zeta| \geq 1$  between  $v, v'$ . Thus  $v' \in L_{|\zeta|}(v)$ .  $\square$

**Lemma 6.** *Let  $G_d$  be strongly connected. Then for all  $v, v' \in V_d$  and  $T \geq 0$ , there exists  $t \geq T$  such that  $v' \in L_t(v)$ .*

*Proof.* If  $v' \in L_T(v)$ , then we are done. If  $v' \notin L_T(v)$ , then choose any vertex  $v_T \in L_T(v)$ . There exists a path  $\zeta^{v \rightarrow v_T}$  that starts from  $v$  and reaches  $v_T$ . Since  $G_d$  is strongly connected there exists a path  $\zeta^{v_T \rightarrow v'}$  that starts from  $v_T$  and reaches  $v'$ . Thus  $\zeta_{v \rightarrow v'} = \zeta_{:-1}^{v \rightarrow v_T} \oplus \zeta^{v_T \rightarrow v'}$  is a path that starts from  $v$  and reaches  $v'$  in  $|\zeta_{v \rightarrow v'}| \geq T$  steps and  $v' \in L_{|\zeta_{v \rightarrow v'}|}(v)$ .  $\square$

**Lemma 7.** *Let  $G_d$  be strongly connected. Let  $T_v \geq 1$  denote the smallest positive horizon such that  $v \in L_{T_v}(v)$ . Then, for all  $v \in V_d$ , the sequence  $(L_{nT_v}(v))_{n \geq 0}$  converges to a limiting layer  $\bar{L}(v) \subseteq V_d$ , i.e., for all  $v \in V_d$ , there exists  $\bar{n}_v \geq 0$  such that, for all  $n \geq \bar{n}_v$ ,  $L_{nT_v}(v) = \bar{L}(v)$ .*

*Proof.* Since  $G_d$  is connected,  $v$  must be able to reach itself again and so there indeed exists a  $T_v \geq 1$  such that  $v \in L_{T_v}(v)$ .

We first show that  $(L_{nT_v}(v))_{n \geq 0}$  is "growing", i.e.  $L_{nT_v}(v) \subseteq L_{(n+1)T_v}(v)$  for all  $n \geq 0$  by induction. The base case when  $n = 0$  holds trivially by how we've defined  $L_{T_v}(v)$  since  $L_0(v) = \{v\} \subseteq L_{T_v}(v)$ . Now assume for induction that  $L_{nT_v}(v) \subseteq L_{(n+1)T_v}(v)$ . Then,

$$L_{(n+1)T_v}(v) = L_{T_v}(L_{nT_v}(v)) \subseteq L_{T_v}(L_{(n+1)T_v}(v)) = L_{(n+2)T_v}(v)$$

by Lemma 2, monotonicity.

We now see that sequence  $\{L_{nT_v}(v)\}_n$  is growing and bounded above, i.e.  $L_{nT_v}(v) \subseteq L_{(n+1)T_v}(v)$  and  $L_{nT_v}(v) \subseteq V_d$  for all  $n \geq 0$ . Thus the sequence must converge to some fixed set  $\bar{L}(v) \subseteq V_d$ , i.e. there exists  $\bar{n}_v \geq 0$  such that  $L_{nT_v}(v) = \bar{L}(v)$  for all  $n \geq \bar{n}_v$ .  $\square$

**Lemma 8.** *Let  $G_d$  be connected. Then, for all  $v \in V_d$ , the sequence  $\{L_t(v)\}_{t \geq 0}$  is **eventually periodic**, i.e. for all  $v \in V_d$ , there exist  $\bar{T}_v \geq 0, \delta_v \geq 1$  such that, for all  $t \geq \bar{T}_v$ ,  $L_t(v) = L_{t+\delta_v}(v)$ .*

*Proof.* By Lemma 7, since  $G_d$  is connected, for all  $v \in V_d$ ,  $(L_{nT_v}(v))_{n \geq 0}$  converges to a limiting layer  $\bar{L}(v)$  i.e. for all  $v \in V_d$ , there exists  $\bar{n}_v \geq 0$  such that, for all  $n \geq \bar{n}_v$ ,  $L_{nT_v}(v) = \bar{L}(v)$ .

Set  $\bar{T}_v = \bar{n}_v T_v$  and  $\delta_v = T_v$ . Then we see that for all  $t \geq \bar{T}_v = \bar{n}_v T_v$ , it holds that

$$\begin{aligned} L_{t+\delta_v}(v) &= L_{(t-\bar{n}_v T_v)+\bar{n}_v T_v+T_v}(v) \\ &= L_{(t-\bar{n}_v T_v)+(\bar{n}_v+1)T_v}(v) \end{aligned} \tag{12}$$

$$= L_{t-\bar{n}_v T_v}(L_{(\bar{n}_v+1)T_v}(v)) \tag{13}$$

$$= L_{t-\bar{n}_v T_v}(L_{\bar{n}_v T_v}(v)) \tag{14}$$

$$= L_{t-\bar{n}_v T_v+\bar{n}_v T_v}(v)$$

$$= L_t(v)$$

where 12  $\rightarrow$  13 holds since  $(\bar{n}_v + 1)T_v \geq 0$  and  $t - \bar{n}_v T_v \geq 0$ . Furthermore, 13  $\rightarrow$  14 holds by Lemma 7 since  $L_{(\bar{n}_v+1)T_v}(v) = \bar{L}(v) = L_{\bar{n}_v T_v}(v)$ .  $\square$

In words, Lemma 8 states that the layers induced by starting at any vertex always converge to a periodic sequence.

**Definition 8.** *Let  $(a_t)_{t \geq 0}$  be a sequence. We say that a sequence  $(b_t)_{t \geq 0}$  is a **tail** of the sequence  $(a_t)_{t \geq 0}$  if and only if there exists an index  $N \geq 0$  such that  $b_t = a_{t+N}$ . Let  $(a_t)_{t \geq 0}$  be an eventually periodic sequence. We say that a sequence  $(b_t)_{t \geq 0}$  is a **periodic tail** of the sequence  $(a_t)_{t \geq 0}$  if and only if  $(b_t)_{t \geq 0}$  is a periodic sequence and a tail of  $(a_t)_{t \geq 0}$ .*

We now prove some characteristics of the periodic tail.

**Lemma 9.** *Let  $G_d$  be strongly connected. Let us denote  $\bar{L}_t(v) := L_t(\bar{L}(v))$ . Then, the sequence  $(\bar{L}_t(v))_{t \geq 0}$  is a periodic tail of the sequence  $\{L_t(v)\}_{t \geq 0}$ .*

*Proof.* From Lemma 7,  $(L_{nT_v}(v))_{n \geq 0}$  converges to  $\bar{L}_0$ , so there exists  $\bar{n}_v$  such that  $L_{\bar{n}_v T_v}(v) = \bar{L}_0(v)$ . Therefore,  $L_{t+\bar{n}_v T_v}(v) = \bar{L}_t(v)$  and  $(\bar{L}_t(v))_{t \geq 0}$  is a tail of the sequence  $\{L_t(v)\}_{t \geq 0}$ . It is left to show that  $(\bar{L}_t(v))_{t \geq 0}$  is periodic.  $(\bar{L}_0(v) = \bar{L}_{T_v}(v)) \Rightarrow (\forall t \geq 0, \bar{L}_t(v) = \bar{L}_{T_v+t}(v))$ , therefore  $(\bar{L}_t(v))_{t \geq 0}$  is periodic.  $\square$

**Lemma 10.** *Let  $G_d$  be strongly connected. Let  $T_v \geq 1$  denote the smallest horizon  $t \geq 1$  such that  $v \in L_t(v)$ . Let  $\delta_v \geq 1$  denote the period of the tail sequence  $(\bar{L}_t(v))_{t \geq 0}$  so that  $\bar{L}_t(v) = \bar{L}_{t'}(v)$  for  $0 \leq t < t'$  if and only if  $(t' - t) \bmod \delta_v = 0$ . Then  $T_v \bmod \delta_v = 0$ .*

*Proof.* We first know that  $T_v \geq \delta_v$  trivially holds since  $\bar{L}_0(v) = \bar{L}_{T_v}(v)$ . Since  $T_v \geq \delta_v > 0$  are integers,  $T_v$  admits a unique quotient  $q \geq 1$  and remainder  $m \geq 0$  by Euclid's lemma, i.e.  $T_v = q\delta_v + m$ . Assume for contradiction that  $m > 0$ . Then,  $q\delta_v < T_v$  and  $m < \delta_v$ . But then we have  $\bar{L}_{q\delta_v}(v) = \bar{L}_{T_v}(v)$  and  $T_v - q\delta_v = m < \delta_v$  and there does not exist an integer  $n > 0$  such that  $T_v - q\delta_v = n\delta_v$  which is a contradiction. Thus it must be that  $m = 0$  as desired.  $\square$

**Lemma 11.** *Let  $G_d$  be strongly connected. Let  $\delta_v \geq 1$  denote the period of the tail sequence  $(\bar{L}_t(v))_{t \geq 0}$  so that  $\bar{L}_t(v) = \bar{L}_{t'}(v)$  for  $0 \leq t < t'$  if and only if  $(t' - t) \bmod \delta_v = 0$ . Then, for all  $v \in V_d$  and  $0 \leq t < t'$  such that  $t' - t \bmod \delta_v \neq 0$ ,  $\bar{L}_t(v) \cap \bar{L}_{t'}(v) = \emptyset$ , i.e. limiting layers within a period are all disjoint sets regardless of the starting vertex. Equivalently, for all  $v \in V_d$  and  $0 \leq t < t'$ ,  $\bar{L}_t(v) = \bar{L}_{t'}(v)$  if  $t' - t \bmod \delta_v = 0$  and  $\bar{L}_t(v) \cap \bar{L}_{t'}(v) = \emptyset$  otherwise.*

*Proof.* Since  $(\bar{L}_t(v))_{t \geq 0}$  is periodic with period  $\delta_v$ , it suffices to prove that for all  $v \in V_d$  and  $0 \leq t < t' \leq \delta_v$  such that  $t' - t < \delta_v$ ,  $\bar{L}_t(v) \cap \bar{L}_{t'}(v) = \emptyset$ . We first prove the following claim:

**Claim 1.** *For all  $v \in V_d$  and  $t \geq 0$ , if  $t \bmod \delta_v \neq 0$ , then  $v \notin \bar{L}_t(v)$ .*

*Proof.* Again, due to periodicity, it suffices to prove that for all  $v \in V_d$  and  $0 < t < \delta_v$ ,  $v \notin \bar{L}_t(v)$ . Assume for contradiction that there exist  $v \in V_d$  and  $0 < t < \delta_v$  such that  $v \in \bar{L}_t(v)$ .

• We then claim that  $\bar{L}_0(v) \subseteq \bar{L}_t(v)$ . Assume, again, for contradiction that  $\bar{L}_0(v) \not\subseteq \bar{L}_t(v)$ . Let  $T_v \geq 1$  denote the smallest horizon  $t \geq 1$  such that  $v \in L_t(v)$ . Since  $G_d$  is connected, by Lemma 10,  $T_v = q\delta_v$  for some quotient integer  $q \geq 1$ . Then for all  $n \geq 0$

$$L_{nT_v}(v) \subseteq L_{nT_v}(\bar{L}_t(v)) = L_{nT_v}(L_t(\bar{L}(v))) = L_{t+nT_v}(\bar{L}(v)) = \bar{L}_{t+nT_v}(v) = \bar{L}_{t+nq\delta_v}(v) \quad (15)$$

where the inclusion relation holds by monotonicity since  $v \in \bar{L}_t(v)$  by outer assumption and the second equality holds by commutativity. (Lemma 2)

Since  $G_d$  is connected, by Lemma 7, there exists  $\bar{n}_v \geq 0$  such that, for all  $n \geq \bar{n}_v$ ,  $L_{nT_v}(v) = \bar{L}(v) = \bar{L}_0(v)$ . Combining this result with Eq. 15, there exists  $\bar{n}_v \geq 0$  such that, for all  $n \geq \bar{n}_v$

$$L_{nT_v}(v) = \bar{L}_0(v) \subseteq \bar{L}_{t+nq\delta_v}(v)$$

Then, since  $\bar{L}_0(v) \not\subseteq \bar{L}_t(v)$ , there exists  $\bar{n}_v \geq 0$  such that  $\bar{L}_t(v) \neq \bar{L}_{t+nq\delta_v}(v)$  for  $n \geq \bar{n}_v$  which contradicts the assumption that  $(\bar{L}_t(v))_{t \geq 0}$  is periodic with period  $\delta_v$ . Thus, by contradiction, we have shown  $\bar{L}_0(v) \subseteq \bar{L}_t(v)$ .

• Now we enumerate all cases for  $\bar{L}_t(v)$  that satisfy  $\bar{L}_0(v) \subseteq \bar{L}_t(v)$ .

If  $\bar{L}_0(v) = \bar{L}_t(v)$ , then this contradicts the assumption that  $(\bar{L}_t(v))_{t \geq 0}$  is periodic with period  $\delta_v$

If  $\bar{L}_0(v) \subset \bar{L}_t(v)$ , then for all  $n \geq 1$ ,

$$\bar{L}_{nt}(v) = L_{nt}(\bar{L}(v)) = L_{nt}(\bar{L}_0(v)) \subseteq L_{nt}(\bar{L}_t(v)) = L_{nt}(L_t(\bar{L}(v))) = L_{(n+1)t}(\bar{L}(v)) = \bar{L}_{(n+1)t}(v)$$

where the inclusion relation holds by monotonicity since we've just assumed  $\bar{L}_0(v) \subset \bar{L}_t(v)$  and the fourth equality holds by commutativity. (Lemma 2) By transitivity this implies that for all  $1 \leq n \leq n'$ ,

$$\bar{L}_{nt}(v) \subseteq \bar{L}_{n't}(v)$$

Choosing  $n = 1$  and  $n' = \delta_v$  we have  $\bar{L}_0(v) \subset \bar{L}_t(v) \subseteq \bar{L}_{\delta_v t}(v)$  and so  $\bar{L}_0(v) \neq \bar{L}_{\delta_v t}(v)$ . Since  $t > 0$  this again contradicts the periodicity of  $(\bar{L}_t(v))_{t \geq 0}$ . Thus we have shown, by contradiction, for all  $v \in V_d$  and  $0 < t < \delta_v$ ,  $v \notin \bar{L}_t(v)$ .  $\square$

Now to prove the original lemma, assume for contradiction that there exists  $0 \leq t < t' \leq \delta_v$  such that  $0 < t' - t < \delta_v$ , and a shared vertex  $v_{t,t'} \in V_d$  such that  $v_{t,t'} \in \bar{L}_t(v)$  and  $v_{t,t'} \in \bar{L}_{t'}(v)$ . Since  $G_d$  is strongly connected  $v_{t,t'}$  can reach  $v$  and so there exists a  $l$  such that  $v \in \bar{L}_{t+l}(v)$  and  $v \in \bar{L}_{t'+l}(v)$  by trivial extension of Lemma 6. We now enumerate all cases for the value of  $t + l$ .

If  $t + l \bmod \delta_v \neq 0$ , this contradicts Claim 1 since  $v \in \bar{L}_{t+l}(v)$ .

If  $t + l \bmod \delta_v = 0$ , then  $t' + l \bmod \delta_v \neq 0$  since  $(t' + l) - (t + l) = t' - t < \delta_v$ . this contradicts Claim 1 since  $v \in \bar{L}_{t'+l}(v)$ .  $\square$

**Lemma 12.** *Let  $G_d$  be strongly connected. Then, for all  $v, v' \in V_d$ , the sequence  $(\bar{L}_t(v))_{t \geq 0}$  is a periodic tail of the sequence  $(L_t(v'))_{t \geq 0}$  i.e. vertex layers all converge to the same periodic sequence regardless of the starting vertex.*

*Proof.* Pick any  $v, v' \in V_d$  and consider their corresponding periodic tails  $(\bar{L}_t(v))_{t \geq 0}, (\bar{L}_t(v'))_{t \geq 0}$ . (which exists by Lemma 8) Without loss of generality, we will let the first layer of the periodic tails be those containing the initial vertex, i.e  $v \in \bar{L}_0(v), v' \in \bar{L}_0(v')$ . Such layers exist in the periodic tail by Lemma 6.

Let  $t_v, t_{v'} \geq 0$  denote the horizons at which  $v \in \bar{L}_{t_v}(v'), v' \in \bar{L}_{t_{v'}}(v)$ . Again, such layers exist by Lemma 6. Then, we claim  $\bar{L}_0(v) \subseteq \bar{L}_{t_v}(v')$ . To see this, first note that the sequence  $(L_{nT_v}(v))_{n \geq 0}$ , where  $T_v \geq 1$  is the shortest time horizon at which  $v \in L_{T_v}(v)$ , converges to  $\bar{L}_0(v)$  by Lemma 7. Furthermore,  $(\bar{L}_{t_v+nT_v}(v'))_{n \geq 0} = (\bar{L}_{t_v}(v'))_{n \geq 0}$  since  $(v \in \bar{L}_{t_v}(v'), \bar{L}_{t_v+nT_v}(v')) \Rightarrow (\bar{L}_{t_v+nT_v}(v') = \bar{L}_{t_v}(v'))$  by Lemma 11. Since  $\{v\} \subseteq \bar{L}_{t_v}(v')$ , it follows from monotonicity (Lemma 2) that  $L_{nT_v}(v) \subseteq L_{nT_v}(\bar{L}_{t_v}(v')) = \bar{L}_{t_v+nT_v}(v') = \bar{L}_{t_v}(v')$  for all  $n \geq 0$ . Since there exists an  $\bar{n}_v \geq 0$  such that  $L_{\bar{n}_v T_v}(v) = \bar{L}_0(v)$ , we thus have  $\bar{L}_0(v) \subseteq \bar{L}_{t_v}(v')$ . The same argument can be applied to obtain  $\bar{L}_0(v') \subseteq \bar{L}_{t_{v'}}(v)$ .

We now consider two different cases. If  $\bar{L}_0(v') = \bar{L}_0(v)$ , then it trivially follows that the sequences  $(\bar{L}_t(v))_{t \geq 0}, (\bar{L}_t(v'))_{t \geq 0}$  are the same. For the second case if  $\bar{L}_0(v') \neq \bar{L}_0(v)$ , then  $\bar{L}_t(v) = L_t(\bar{L}_0(v)) \subseteq L_t(\bar{L}_{t_v}(v')) = \bar{L}_{t_v+t}(v')$  for all  $t \geq 0$  and  $\bar{L}_t(v') = L_t(\bar{L}_0(v')) \subseteq L_t(\bar{L}_{t_{v'}}(v)) = \bar{L}_{t_{v'}+t}(v)$  for all  $t \geq 0$ . Thus  $\bar{L}_0(v) \subseteq \bar{L}_{t_v}(v') \subseteq \bar{L}_{t_v+t_{v'}}(v)$ . Then,  $v \in \bar{L}_0(v) \Rightarrow v \in \bar{L}_{t_v+t_{v'}}(v)$  and it follows that  $\bar{L}_0(v) = \bar{L}_{t_v+t_{v'}}(v)$  by Lemma 11. Thus,  $\bar{L}_0(v) = \bar{L}_{t_v}(v')$  which implies that  $\bar{L}_t(v) = \bar{L}_{t_v+t}(v')$  for all  $t \geq 0$  and so  $(\bar{L}_t(v))_{t \geq 0}$  is a tail of  $(\bar{L}_t(v'))_{t \geq 0}$ .  $\square$

From Lemma 12, we see that the layer sequence converges to the same periodic tail sequence regardless of the starting vertex. Thus, we shall henceforth denote a periodic tail of  $G_d$  as  $(\bar{L}_t)_{t \geq 0}$ , dropping the dependence on initial vertex.

**Lemma 13.** *Let  $G_d$  be strongly connected and let  $(\bar{L}_t)_{t \geq 0}$  be a periodic tail of the layer sequences in  $G_d$ . For all  $v \in V_d$  and  $t, t' \geq 0$ ,  $(L_t(v) \cap \bar{L}_{t'} \neq \emptyset) \Rightarrow (L_t(v) \subseteq \bar{L}_{t'})$*

*Proof.* Suppose for contradiction that there exists  $v \in V_d$  and  $t, t' \geq 0$  such that  $(L_t(v) \cap \bar{L}_{t'} \neq \emptyset)$ , but  $(L_t(v) \not\subseteq \bar{L}_{t'})$ . Let  $v^- \in L_t(v) - \bar{L}_{t'}$  and  $v^\cap \in L_t(v) \cap \bar{L}_{t'}$ .

Let  $T_v \geq 1$  denote the smallest positive horizon such that  $v \in L_{T_v}(v)$ . Then,  $L_{nT_v+t}(v) = L_t(L_{nT_v}(v)) \subseteq L_t(L_{(n+1)T_v}(v)) = L_{(n+1)T_v+t}(v)$  for all  $n \geq 0$  by Lemma 2 since  $L_{nT_v}(v) \subseteq L_{(n+1)T_v}(v)$  from the proof of Lemma 7. Thus, the sequence  $(L_{nT_v+t}(v))_{n \geq 0}$  must converge to some fixed set  $\bar{L}_{t^*}$  since the sequence is growing and bounded above, i.e  $L_{nT_v}(v) \subseteq L_{(n+1)T_v}(v)$  and  $L_{nT_v}(v) \subseteq V_d$  for all  $n \geq 0$ . Thus,  $\bar{L}_{t^*}$  is an element of the tail  $(\bar{L}_t)_{t \geq 0}$ . Since  $v^-, v^\cap \in L_t(v)$ , we have  $v^-, v^\cap \in \bar{L}_{t^*}$ . This contradicts Lemma 11 since  $\bar{L}_{t'}, \bar{L}_{t^*}$  are two tail layers that are not the same but also not disjoint.  $\square$

We now prove the necessary direction of the main theorem. We show the contrapositive, i.e if either  $\mathcal{P}_{\text{MDP}}[R; d, T, J]$  is not weakly identifiable or not coverable, it is not strongly identifiable. By Proposition 1,  $\mathcal{P}_{\text{MDP}}[R; d, T, J]$  must be weakly identifiable to be strongly identifiable. Thus, consider  $\mathcal{P}_{\text{MDP}}[R; d, T, J]$  that is weakly identifiable but not coverable. By Proposition 2 it suffices to show that  $\exists r, \hat{r} \in R$  such that  $r \not\cong_{x,a} \hat{r}$  but  $r \cong_\tau \hat{r}$ .

Let  $(\bar{L}_t)_{t \geq 0}$  be a periodic tail of the layer sequences in  $G_d$ . Let  $r, \hat{r}$  be two rewards such that  $\forall v \notin \bar{L}_0, \hat{r}(v) = r(v)$  and  $\forall v \in \bar{L}_0, \hat{r}(v) = r(v) + c$  for some constant  $c \in \mathbb{R}$ . Since there does not exist a covering initial state, clearly,  $\bar{L}_0 \subset V_d$  and thus  $r \not\cong_{x,a} \hat{r}$ . We will show that  $r \cong_\tau \hat{r}$  to conclude that the  $\mathcal{P}_{\text{MDP}}[R; d, T, J]$  is not strongly identifiable.

For all  $v \in V_d^0$  and for all paths  $\zeta = (v_t)_{0 \leq t \leq T}, \zeta' = (v'_t)_{0 \leq t \leq T}$  such that  $\zeta, \zeta' \in Z[v, d, T]$ , we claim that  $\hat{r}(v_t) - \hat{r}(v'_t) = r(v_t) - r(v'_t)$  for all  $0 \leq t \leq T$ . To see this, first note that  $v_t, v'_t \in L_t(v)$  for all  $t \geq 0$ . We consider two cases: (1). If  $v_t \in \bar{L}_0$ , then  $v'_t \in \bar{L}_0$  since  $v_t, v'_t \in L_t(v)$  and, by Lemma 13,  $(L_t(v) \cap \bar{L}_{t'} \neq \emptyset) \Rightarrow (L_t(v) \subseteq \bar{L}_{t'})$ . Thus,  $\hat{r}(v_t) - \hat{r}(v'_t) = r(v_t) + c - r(v'_t) - c = r(v_t) - r(v'_t)$ . (2) If  $v_t \notin \bar{L}_0$ , then  $v'_t \notin \bar{L}_0$  since  $v_t, v'_t \in L_t(v)$  and, by the contrapositive of Lemma 13,  $(L_t(v) \not\subseteq \bar{L}_0) \Rightarrow (L_t(v) \cup \bar{L}_0 = \emptyset)$ . Thus,  $\hat{r}(v_t) - \hat{r}(v'_t) = r(v_t) - r(v'_t)$ .

Then,

$$\begin{aligned} r(\zeta') - r(\zeta) &= \sum_{t=0}^T \gamma^t (r(v'_t) - r(v_t)) \\ &= \sum_{t=0}^T \gamma^t (\hat{r}(v'_t) - \hat{r}(v_t)) \\ &= \hat{r}(\zeta') - \hat{r}(\zeta) \end{aligned}$$



Therefore,  $r, \hat{r}$  are two trajectory equivalent rewards which are not state-action equivalent. Hence  $\mathcal{P}_{\text{MDP}}[R; d, T, J]$  is not strongly identifiable.  $\square$

**Corollary 2.** (Strong Identification Condition) *For all  $(d, r, T, J)$  such that  $\mathcal{P}_{\text{MDP}}[R; d, T, J]$  is a proper MDP model and  $G_d$  is strongly connected,*

- (Sufficiency)  $\mathcal{P}_{\text{MDP}}[R; d, T, J]$  is weakly identifiable,  $G_d$  aperiodic  $\Rightarrow \exists T_0 \geq 0$  such that  $\forall T \geq T_0, \mathcal{P}_{\text{MDP}}[R; d, T, J]$  is strongly identifiable
- (Necessity)  $\mathcal{P}_{\text{MDP}}[R; d, T, J]$  is strongly identifiable  $\Rightarrow \mathcal{P}_{\text{MDP}}[R; d, T, J]$  is weakly identifiable,  $G_d$  is aperiodic.

*Proof.* Let  $\mathcal{P}_{\text{MDP}}[R; d, T, J]$  be proper and  $G_d$  be strongly connected. • (Sufficiency) Since  $G_d$  is strongly connected and aperiodic, it is covering by Proposition 3, i.e there exists an initial vertex  $v_0 \in V_d^0$  that is  $t^*$ -covering for some  $t^*$ . Let  $T_0 = 2t^*$ ,  $\mathcal{P}_{\text{MDP}}[R; d, T, J]$  is strongly identifiable for all  $T \geq T_0$  by Theorem 2.

• (Necessity) If  $\mathcal{P}_{\text{MDP}}[R; d, T, J]$  is proper, strongly identifiable, and  $G_d$  is strongly connected, by Theorem 3, it is weakly identifiable and  $G_d$  is coverable. Since,  $G_d$  is strongly connected and coverable, it is aperiodic by Proposition 3.  $\square$

### A.5. Strong Identifiability Test Algorithms

**Theorem 3.** *Let  $\mathcal{P}_{\text{MDP}}[R; d, T, J]$  be a weakly identifiable MDP model and  $G_d$  be strongly connected. Then,*

- (Correctness)  $\text{MDPIdTest}(\mathcal{P}_{\text{MDP}}[R; d, T, J])$  returns 1 (True) if and only if  $\exists T$  such that  $\mathcal{P}_{\text{MDP}}[R; d, T, J]$  is strongly identifiable.
- (Efficiency)  $\text{MDPIdTest}$  runs with time and space complexity  $O(|E_d|)$

*Proof.* • (Correctness)  $\text{MDPIdTest}$  returns 1 (True) if and only if the directed graph  $G_d$  is aperiodic as shown in (Denardo, 1977; Jarvis and Shier, 1999). Since  $\mathcal{P}_{\text{MDP}}[R; d, T, J]$  is weakly identifiable and  $G_d$  is strongly connected,  $G_d$  is aperiodic if and only if  $\exists T$  such that  $\mathcal{P}_{\text{MDP}}[R; d, T, J]$  is strongly identifiable by Corollary 2.

• (Efficiency) Graph aperiodicity testing can be done in  $O(|E_d|)$  space and time as shown in (Denardo, 1977; Jarvis and Shier, 1999).  $\square$

**Corollary 3.** (Strong Identification Condition) *For all  $(d, r, T, J)$  such that the MDP model  $\mathcal{P}_{\text{MDP}}[R; d, T, J]$  is proper:*

- (Sufficiency)  $\mathcal{P}_{\text{MDP}}[R; d, T, J]$  is weakly identifiable,  $G_d$  is  $T_0$ -coverable, and  $T \geq 2T_0 \Rightarrow \mathcal{P}_{\text{MDP}}[R; d, T, J]$  is strongly identifiable

*Proof.* This result immediately follows from the proof of the Sufficiency direction for Theorem 2.  $\square$

**Theorem 4.** *Let  $\mathcal{P}_{\text{MDP}}[R; d, T, J]$  be a weakly identifiable MDP model. Then,*

- (Correctness) If  $\text{MDPCoverTest}(\mathcal{P}_{\text{MDP}}[R; d, T, J])$  returns 1 (True) then,  $\exists T_0$  such that  $\forall T \geq T_0, \mathcal{P}_{\text{MDP}}[R; d, T, J]$  is strongly identifiable.
- (Efficiency)  $\text{MDPCoverTest}$  runs with time complexity  $O(|V_d|^3 \log |V_d|)$  and space complexity  $O(|V_d|^2)$

*Proof.* • Since  $M$  is the transition matrix, i.e  $M_{ij} = \tilde{P}(v^{(j)}|v^{(i)})$  where  $\tilde{P}(x', a'|x, a) = P(x'|x, a)$ , it is clear that  $M_{ij}^{|V_d|^2} \neq 0$  if and only if  $v^{(j)} \in L_{|V_d|^2}(v^{(i)})$ . If  $\text{MDPCoverTest}$  returns 1 (True), then there exists  $v^{(i)} \in V_d^0$  that has a fully non-zero row  $M_i^{|V_d|^2}$ , i.e  $L_{|V_d|^2}(v^{(i)}) = V_d$ . Thus,  $G_d$  is  $|V_d|^2$ -coverable by  $v^{(i)}$ . Let  $T_0 = 2|V_d|^2$  and the result follows from Corollary 3. Therefore,  $\text{MDPCoverTest}$  returns 1 (True) if and only if

• (Efficiency) It is well known that computing matrix powers  $A^m$  (where the matrix  $A$  has size  $n \times n$ ) can be done in  $O(n^3 \log m)$  time and  $O(n^2)$  space (Cormen et al., 2009). Since  $M$  has size  $|V_d| \times |V_d|$ , computing  $M^{|V_d|^2}$  has time complexity  $O(|V_d|^3 \log |V_d|^2) = O(|V_d|^3 \log |V_d|)$  and space complexity  $O(|V_d|^2)$ . A naive approach to checking for rows

## Reward Identification in Inverse Reinforcement Learning

---

with only non-zero entries requires enumerating over all elements of  $M$  which can be done in  $O(|V_d|^2)$  time and  $O(1)$  space, thus not affecting the overall efficiency of the algorithm.

□
